# Supplementary material for: Role of Chitin Deacetylase 1 in the Molting and Metamorphosis of the Cigarette Beetle Lasioderma serricorne
Source: PubMed Central journal article supplement (PMC7177437; doi:10.3390/ijms21072449), 2020-04-01
Supplement: ijms-21-02449-s001.pdf [file ijms-21-02449-s001.pdf]

## Supplementary Tables

**Table S1.** Details of chitin deacetylase sequences used for phylogenetic analysis.

| <b>Insect Species</b>          | <b>Gene Name</b> | <b>Accession Number</b> |
|--------------------------------|------------------|-------------------------|
| <i>Bombyx mori</i>             | <i>BmCDA1</i>    | XP_004929283.1          |
|                                | <i>BmCDA2A</i>   | NP_001103795.1          |
|                                | <i>BmCDA2B</i>   | NP_001103796.1          |
|                                | <i>BmCDA3A</i>   | XP_021207356.1          |
|                                | <i>BmCDA3B</i>   | XP_004931841.2          |
|                                | <i>BmCDA4</i>    | XP_012548585.1          |
|                                | <i>BmCDA5</i>    | XP_021207767.1          |
|                                | <i>BmCDA6</i>    | XP_004923454.1          |
|                                | <i>BmCDA7</i>    | XP_004923480.1          |
|                                | <i>BmCDA8</i>    | XP_004923455.1          |
| <i>Bactrocera dorsalis</i>     | <i>BdCDA1</i>    | AUP42574.1              |
|                                | <i>BdCDA2A</i>   | AUP42576.1              |
|                                | <i>BdCDA2B</i>   | AUP42575.1              |
|                                | <i>BdCDA3</i>    | AUP42577.1              |
|                                | <i>BdCDA4</i>    | AUP42578.1              |
|                                | <i>BdCDA5</i>    | XP_011210019.1          |
|                                | <i>BdCDA9</i>    | AUP42579.1              |
| <i>Drosophila melanogaster</i> | <i>DmCDA1</i>    | NP_730444               |
|                                | <i>DmCDA2</i>    | NP_001163469            |
|                                | <i>DmCDA3</i>    | NP_609806               |
|                                | <i>DmCDA4</i>    | NP_728468               |
|                                | <i>DmCDA5</i>    | NP_001097044            |
|                                | <i>DmCDA9</i>    | NP_611192               |
| <i>Apis mellifera</i>          | <i>AmCDA1</i>    | XP_391915               |
|                                | <i>AmCDA2</i>    | XP_623723               |
|                                | <i>AmCDA4</i>    | XP_001120478            |
|                                | <i>AmCDA5</i>    | XP_624655               |
| <i>Tribolium castaneum</i>     | <i>TcCDA1</i>    | NP_001095946            |
|                                | <i>TcCDA2A</i>   | NP_001096047            |
|                                | <i>TcCDA2B</i>   | NP_001116303            |
|                                | <i>TcCDA3</i>    | NP_001104011            |
|                                | <i>TcCDA4</i>    | NP_001103903            |
|                                | <i>TcCDA5A</i>   | NP_001103739            |
|                                | <i>TcCDA5B</i>   | NP_001107799            |
|                                | <i>TcCDA6</i>    | NP_001103905            |
|                                | <i>TcCDA7</i>    | NP_001104012            |
|                                | <i>TcCDA8</i>    | NP_001103906            |
|                                | <i>TcCDA9</i>    | NP_001103904            |
| <i>Nasonia vitripennis</i>     | <i>NvCDA1</i>    | XP_001604765            |
|                                | <i>NvCDA2</i>    | XP_001604838            |
|                                | <i>NvCDA3</i>    | XP_001606617            |
|                                | <i>NvCDA4</i>    | XP_001607989            |
|                                | <i>NvCDA5</i>    | XP_001603918            |
| <i>Lasioderma serricorne</i>   | <i>LsCDA1</i>    | AXU05961.1              |
| <i>Mamestra brassicae</i>      | <i>MbCDA1</i>    | AEI30868.1              |

|                             |                |            |
|-----------------------------|----------------|------------|
| <i>Stegobium paniceum</i>   | <i>SpCDA1</i>  | AYA83838.1 |
| <i>Helicoverpa armigera</i> | <i>HaCDA1</i>  | ADB43610.1 |
|                             | <i>HaCDA2</i>  | KM598637   |
| <i>Heortia vitessoides</i>  | <i>HvCDA1</i>  | MK389498   |
|                             | <i>HvCDA2</i>  | MK389499   |
| <i>Locusta migratoria</i>   | <i>LmCDA1</i>  | ANA57443.1 |
|                             | <i>LmCDA2A</i> | ANA57444.1 |
|                             | <i>LmCDA2B</i> | ANA57445.1 |

**Table S2.** Primers used in this study.

| <b>Application of Primers</b> | <b>Gene Name</b>              | <b>Forward Primer (5'-3')</b>                  | <b>Reverse Primer (5'-3')</b>                  |
|-------------------------------|-------------------------------|------------------------------------------------|------------------------------------------------|
| ORF confirmation              | <i>LsCDA1</i>                 | ATTTGTGATGGCGCCACGTTTA                         | TTAGAAGAAACCATCTCCGGTGG                        |
|                               | <i>LsCDA1</i>                 | GCTTTCTTGTTTTGGGTGGA                           | CGAGGTCAATTTGCAGGAAT                           |
| qPCR analysis                 | <i>LsTRE1</i>                 | CCTACGGACCAAGACCTGAA                           | TTTGTTGGTTGCGTTGGTAA                           |
|                               | <i>LsUAP1</i>                 | GGCAACACTGATCCATCCTT                           | GGCACTCTGCACGATTATGA                           |
|                               | <i>LsCHS1</i>                 | AAAGAAGAATCTGGTTCTCT                           | ATATAGTGCTCTCGTCACCA                           |
|                               | <i>LsDY</i>                   | GAGATGACGGACGTGAACAC                           | TCAACACCAACAGCAGCATC                           |
|                               | <i>LsWG</i>                   | AGCCTCCCAATCCCACT                              | AGGGCAGCATCGAGACCT                             |
|                               | <i>LsVG</i>                   | GGGCTGTTACGATTACCAT                            | GAATCCTGAACTTGCGCTTC                           |
|                               | <i>LsAP</i>                   | TTTTCGGAATGAGGAGATGC                           | AAGGCGATGGATAATGCAAG                           |
|                               | <i>EF1<math>\alpha</math></i> | GCATCTCCACGGATTTCACT                           | AAGGCAAGACGCTTATCGAA                           |
|                               | <i>18S</i>                    | GTTGATCACGTCGCAAGCTA                           | AGGTTTCCCTCTGGCTTGTT                           |
|                               | dsRNA synthesis               | <i>LsCDA1</i>                                  | TAATACGACTCACTATAGGGACCTCTGTTGTATAC<br>TGATG   |
| <i>LsCYP302a1</i>             |                               | TAATACGACTCACTATAGGGTTTGATCGTCTACAC<br>CAGAA   | TAATACGACTCACTATAGGGAAGTCTCATTGCTT<br>CTACT    |
| <i>LsCYP306a1</i>             |                               | TAATACGACTCACTATAGGGATCGTCGGTACTTG<br>CCTTT    | TAATACGACTCACTATAGGGGCGCTATGCTTGCTC<br>ATGCC   |
| <i>LsCYP314a1</i>             |                               | TAATACGACTCACTATAGGGAAGCATATAAGCGG<br>TTGGTT   | TAATACGACTCACTATAGGGGGTACCAACAAGAA<br>CTCAA    |
| <i>LsE74</i>                  |                               | TAATACGACTCACTATAGGGCGCCGCTCCGACT<br>AAACATC   | TAATACGACTCACTATAGGGGGTATGAGTGGTGC<br>CATCTGT  |
| <i>LsE78</i>                  |                               | TAATACGACTCACTATAGGGCGACCAGTCCGATT<br>CCGAAAC  | TAATACGACTCACTATAGGGCGGCACCCTCTTGG<br>CAAACCTC |
| <i>LsFTZ-F1</i>               |                               | TAATACGACTCACTATAGGGCGAAAATATGTCATT<br>GTTT    | TAATACGACTCACTATAGGGAGTGCTCGTCGAAC<br>TGATTCCG |
| <i>GFP</i>                    |                               | TAATACGACTCACTATAGGGCAGTTCCTTGTTGAAT<br>TAGATG | TAATACGACTCACTATAGGGAATGTTACCATCTTC<br>TTTAA   |
